# Supplementary material for: Endowing plants with the capacity for autogenic nitrogen fixation
Source: Research Square preprint supplement (doi:10.21203/rs.3.rs-436726/v1), 2021-05-07
Supplement: Supplementary file 1 [file 13b5a5f9a2aad6f6938406a9.xlsx]

## Sheet: fig3A
	LEP				internal standard			average of internal standard				2-ct				2-ct average	error (SD)
	Col-0	31.18	31.49	31.77	20.8	21.71	20.94	21.15	10.03	10.34	10.62	0.000956465	0.000771525	0.000635421		0.000787804	0.00016114
	35S:VvHsfA9-#9	29.78	29.69	29.67	21.44	21.52	21.57	21.51	8.27	8.18	8.16	0.00323953	0.00344806	0.00349619		0.00339459	0.000136429
	35S:VvHsfA9-#10	30.06	30.01	29.89	21.62	21.37	21.51	21.5	8.56	8.51	8.39	0.00264962	0.00274306	0.00298098		0.00279122	0.000170848
R46543.R46544	CK	36.33	38.25	36.49	29.38	29.35	29.39	29.3733	6.95667	8.87667	7.11667	0.00805072	0.00212744	0.0072056	CK	0.00579458	0.00320383	0.0032
nifB	37	32.71	32.6	33.34	29.46	29.32	29.51	29.43	3.28	3.17	3.91	0.102949	0.111105	0.0665231	37	0.0935258	0.0237379	0.00374
	54	31.54	32.72	31.44	28.43	28.93	28.67	28.6767	2.86333	4.04333	2.76333	0.13742	0.0606506	0.147283	54	0.115118	0.0474273	0.00474
	58	32.73	33.63	34.18	28.41	28.42	27.64	28.1567	4.57333	5.47333	6.02333	0.0420039	0.0225093	0.0153743	58	0.0266292	0.0137845	0.00378
R46545.R46546	CK	40	40.95	40	28.93	29.52	28.5	28.9833	11.0167	11.9667	11.0167	0.000482673	0.000249847	0.000482673	CK	0.000405064	0.000134422	0.0001
nifH	37	32.36	32.46	32.59	29.5	29.5	29.74	29.58	2.78	2.88	3.01	0.145592	0.135842	0.124137	37	0.13519	0.0107424	0.0074
	54	30.69	32.69	31.76	28.22	28.93	28.12	28.4233	2.26667	4.26667	3.33667	0.207809	0.0519524	0.0989836	54	0.119582	0.0799442	0.0079
	58	33.56	34.16	34.48	28.25	28.39	28.48	28.3733	5.18667	5.78667	6.10667	0.0274573	0.0181151	0.0145114	58	0.0200279	0.00668155	0.0067
R46547.R46548	CK	40	40	40	29.18	28.71	27.7	28.53	11.47	11.47	11.47	0.000352522	0.000352522	0.000352522	CK	0.000352522	6.63936e-20	0.0001
nifD	37	31.33	33.81	33.78	29.59	29.42	28.34	29.1167	2.21333	4.69333	4.66333	0.215636	0.0386515	0.0394636	37	0.0979169	0.101948	0.0102
	54	32.09	32.67	33.18	29.41	29.25	29.11	29.2567	2.83333	3.41333	3.92333	0.140308	0.0938608	0.0659112	54	0.100027	0.0375796	0.0076
	58	31.52	34.28	32.4	27.53	28.06	27.32	27.6367	3.88333	6.64333	4.76333	0.0677642	0.0100036	0.0368208	58	0.0381962	0.0289048	0.0089
R46549.R46550	CK	37.06	37.1	40	28.43	29.96	28.75	29.0467	8.01333	8.05333	10.9533	0.00387031	0.00376448	0.000504334	CK	0.00271304	0.00191353	0.0009
nifK	37	31.94	32.55	32.99	30.64	30.16	30.63	30.4767	1.46333	2.07333	2.51333	0.362654	0.23761	0.17515	37	0.258472	0.0954768	0.055
	54	32.34	32.5	33.1	30.39	30.12	30.47	30.3267	2.01333	2.17333	2.77333	0.2477	0.221698	0.146266	54	0.205221	0.0526861	0.053
	58	32.54	34.39	34.7	29.32	29.02	27.9	28.7467	3.79333	5.64333	5.95333	0.0721262	0.0200072	0.0161387	58	0.0360907	0.0312675	0.004
R46551.R46552	CK	37.24	37.03	38.44	29.66	29.49	29.23	29.46	7.78	7.57	8.98	0.00454974	0.00526263	0.00198039	CK	0.00393092	0.00172641	0.0017
nifE	37	32	32.43	32.51	30.47	30.4	30.09	30.32	1.68	2.11	2.19	0.312083	0.231647	0.219151	37	0.254294	0.0504352	0.05
	54	30.93	32.8	31.79	29.68	29.71	29.59	29.66	1.27	3.14	2.13	0.41466	0.11344	0.228458	54	0.100181	0.152005	0.045
	58	32.69	32.76	33.21	29.21	29.05	29.68	29.3133	3.37667	3.44667	3.89667	0.0962769	0.091717	0.0671408	58	0.0850449	0.0156721	0.01
R46553.R46554	CK	34.16	36.38	37.34	30.01	29.53	28.69	29.41	4.75	6.97	7.93	0.0371627	0.00797666	0.00410046	CK	0.0164133	0.0180738	0.006
nifN	37	31.18	32.74	32.28	30.38	30.48	28.53	29.7967	1.38333	2.94333	2.48333	0.383332	0.130007	0.178831	37	0.230723	0.134399	0.054
	54	31.85	32.19	32.42	30.23	30.53	30.08	30.28	1.57	1.91	2.14	0.336808	0.266093	0.22688	54	0.276594	0.0557116	0.025
	58	31.1	33.15	32.99	28.36	28.73	28.2	28.43	2.67	4.72	4.56	0.157127	0.0379436	0.0423939	58	0.0791547	0.0675623	0.0067
R46555.R46556	CK	37.87	37.52	40	27.45	29.3	27.83	28.1933	9.67667	9.32667	11.8067	0.00122189	0.00155738	0.000279151	CK	0.00101947	0.000662718	0.00066
nifV	37	32.59	33.05	32.84	30.43	30.02	30.44	30.2967	2.29333	2.75333	2.54333	0.204004	0.148308	0.171546	37	0.174619	0.0279748	0.0179
	54	32.81	34.08	33.18	30.02	28.16	30.88	29.6867	3.12333	4.39333	3.49333	0.114758	0.0475855	0.0887977	54	0.0837138	0.0338736	0.0139
	58	31.14	33.08	32.98	27.99	28.02	27.24	27.75	3.39	5.33	5.23	0.0953912	0.0248605	0.0266448	58	0.0489655	0.0402157	0.012
R46557.R46558	CK	40	40	40	28.55	28.68	28.77	28.6667	11.3333	11.3333	11.3333	0.000387549	0.000387549	0.000387549	CK	0.000387549	0	0
hesA	37	33.13	33.4	33.15	30.14	30.03	30.06	30.0767	3.05333	3.32333	3.07333	0.120463	0.0999026	0.118805	37	0.113057	0.0114221	0.011
	54	31.38	34.03	33.07	29.42	29.26	29.62	29.4333	1.94667	4.59667	3.63667	0.259415	0.04133	0.0803997	54	0.127048	0.116286	0.011
	58	33.78	33.84	34.52	29.05	29.08	29.33	29.1533	4.62667	4.68667	5.36667	0.0404794	0.0388305	0.0242366	58	0.0345155	0.00893987	0.008
NIFXF,NIFXZ	CK	37.28	38.3	34.35	27.8	29.04	28.36	28.4	8.88	9.9	5.95	0.00212253	0.00104665	0.016176	CK	0.0064484	0.00844152	0.0008
	37	33.77	34.25	33.24	30.6	30.32	30.61	30.51	3.26	3.74	2.73	0.104386	0.0748424	0.150726	37	0.109985	0.0382503	0.018
	54	34.75	36.51	33.57	31	30.98	31.38	31.12	3.63	5.39	2.45	0.0807721	0.0238478	0.183011	54	0.0958769	0.0806494	0.008
	58	34.39	36.11	34.57	28.13	28.25	27.58	27.9867	6.40333	8.12333	6.58333	0.0118142	0.00358619	0.0104284	58	0.00860961	0.00440524	0.004
