# Supplementary material for: Endowing plants with the capacity for autogenic nitrogen fixation
Source: Research Square preprint supplement (doi:10.21203/rs.3.rs-436726/v1), 2021-05-07
Supplement: Supplementary file 2 [file a53c2fe73a50e406584ad208.xlsx]

## Sheet: Figure 3D
	Raw data for figure 3D
	Fresh weight after 15d culture in short-day condition
	Fresh weight mg/8 plants
			0 mg/L KNO3				50mg/L KNO3
					average				average
	CK	4.4	4.1	4.5	0.541667	5.1	5.2	5.3	0.65
	0.1mM(NH4)2SO4	3.5	3.6	3.3	0.433333	8.5	8.3	8.6	1.05833
	405-58	3.6	3.1	3.2	0.4125	5.6	6.1	5.8	0.729167
	404-37	3.4	3.8	3.7	0.454167	6.3	6.5	6.2	0.791667
	405-54	3.4	3.2	3.5	0.420833	6.7	6.8	6.5	0.833333
		0	50mg/L KNO3	error (SD)	0mg/L KNO3	error (SD)	50mg/L KNO3
	CK	0.54	0.65	0.026021	0.026021	0.0125	0.0125
Fig3D	(NH4)2SO4	0.43	1.06	0.019094	0.019094	0.0190941	0.019094
	405-58	0.41	0.73	0.033072	0.033072	0.0314576	0.031458
	404-37	0.45	0.79	0.026021	0.026021	0.0190941	0.019094
	405-54	0.42	0.83	0.019094	0.019094	0.0190941	0.019094

## Sheet: Figure 3E
Raw data for figure 3E
	The protein content was detected by OD280, and BSA was used as the standard.Seedlings of 100 mg were ground in buffer and dilute to 1mg/ml for detection.
Protein content				0 mg/L KNO3					50 mg/L KNO3
		OD280			average	protent content			OD280			average	protent content
	CK	0.6243	0.6185	0.6124	0.6184	9.276			0.9891	1.0285	1.0427	1.0201	15.3015
	0.1mM(NH4)2SO4	0.8129	0.8411	0.8701	0.841367	12.6205
	404-37	0.9666	0.9691	0.9732	0.969633	14.5445			1.0606	1.0721	1.0707	1.0678	16.017
	405-58	0.8683	0.8905	0.9131	0.890633	13.3595			1.0685	1.0589	1.0536	1.06033	15.905
	405-54	0.9451	0.9228	0.9151	0.927667	13.915			1.0876	1.0988	1.1137	1.10003	16.5005
		0	50 mg/L KNO3		error (SD) 0 mg/L KNO3		error (SD) 50 mg/L KNO3
	WT	9.28	15.3		0.0892595	0.089259	0.416547	0.416547
	(NH4)2SO4	12.6			0.429014	0.429014
	404-37	14.5	16		0.0499825	0.049982	0.0941183	0.094118
	405-58	13.4	15.9		0.336004	0.336004	0.113291	0.113291
	405-54	13.9	16.5		0.233713	0.233713	0.196405	0.196405

## Sheet: Figure 3F
Raw data for figure 3F
	The seedling was ground with 10mg/100µl ethanol(96%) ,then the extracted solution was diluted four times.
OD665		OD649
0.0737		0.0742		Blank
0.0716		0.0733		Blank
0.3096	0.2376	0.1885	0.115	ck
0.3125	0.2405	0.1912	0.1177
0.2982	0.2262	0.1904	0.1169
0.3193	0.2473	0.1881	0.1146	404-3
0.3345	0.2625	0.1892	0.1157
0.3027	0.2307	0.1864	0.1129
0.4563	0.3843	0.2762	0.2027	405-34
0.4623	0.3903	0.2962	0.2227
0.4417	0.3697	0.2557	0.1822
0.394	0.322	0.2393	0.1658	405-58
0.3837	0.3117	0.2313	0.1578
0.4032	0.3312	0.2488	0.1753
0.379	0.307	0.2274	0.1539	404-37
0.3933	0.3213	0.2442	0.1707
0.3666	0.2946	0.2098	0.1363
0.4252	0.3532	0.2592	0.1857	405-54
0.4056	0.3336	0.2695	0.196
0.4443	0.3723	0.2492	0.1757
	Ca		Cb		C(a+b)			average		error (SD)
ck	2.52332	ck	1.13117	ck	3.65449	ck	146.18	146.537		2.20728
	2.5452		1.17733		3.72253		148.901
	2.35122		1.26204		3.61326		144.53
404-3	2.66139	404-3	1.05018	404-3	3.71157	404-3	148.463	148.194		5.23433
	2.86586		0.966372		3.83223		153.289
	2.44151		1.12926		3.57077		142.831
405-34	3.96641	405-34	2.24632	405-34	6.21272	405-34	248.509	247.628		17.3931
	3.91251		2.7016		6.6141		264.564
	3.90378		1.84151		5.74529		229.811
405-58	3.3512	405-58	1.78133	405-58	5.13252	405-58	205.301	205.565		8.91664
	3.26255		1.65704		4.91959		196.784
	3.41418		1.9511		5.36528		214.611
404-37	3.22382	404-37	1.5941	404-37	4.81792	404-37	192.717	192.692		15.9795
	3.30772		1.90876		5.21648		208.659
	3.17193		1.24558		4.4175		176.7
405-54	3.64952	405-54	2.04965	405-54	5.69917	405-54	227.967	227.995		2.20899
	3.30524		2.45021		5.75545		230.218
	3.98477		1.66024		5.64501		225.8
	C(a+b)	error (SD)
ck	146.5	2.20728	2.20728
405-58	205.6	8.91664	8.91664
404-37	192.7	15.9795	15.9795
405-54	228	2.20899	2.20899

## Sheet: Figure3G
Raw data for figure 3G
	The seedling was ground with 10mg/100µl ethanol(96%) ,then the extracted solution was diluted two times.
	OD665		OD649		OD470		Ca	Cb	C(a+b)	Cx.c	Ca content	average	error	Cb content	average	error	C(a+b)content	average	error	Cx.c content	average	error
ck1	-0.0064	-0.00893334	-0.0062	-0.00896667	-0.0073	-0.0113
ck2	-0.0091		-0.0093		-0.0115
ck3	-0.0113		-0.0114		-0.0151
WT1	0.8475	0.85643	0.3018	0.31077	0.9321	0.9434	9.8091	1.48775	11.2969	3.03426	196.182	198.837	4.23348	29.755	36.6883	6.41398	225.937	235.525	10.1344	0.0606853	0.0593302	0.00178083
WT2	0.8937	0.90263	0.3407	0.34967	0.9637	0.975	10.186	2.12051	12.3065	2.86566	203.719			42.4102			246.129			0.0573132
WT3	0.8587	0.86763	0.3214	0.33037	0.9703	0.9816	9.83049	1.89498	11.7255	2.99961	196.61			37.8997			234.51			0.0599922
405-54-1	2.4944	2.50333	1.3215	1.33047	2.6531	2.6644	25.7678	14.8842	40.7584	3.64063	515.356	506.313	21.7952	297.683	307.951	10.2637	813.039	814.264	25.4878	0.0728125	0.0657956	0.01177
405-54-2	2.3642	2.37313	1.3039	1.31287	2.4531	2.4644	24.0726	15.3979	39.5756	2.61036	481.452			307.958			789.411			0.0522072
405-54-3	2.5465	2.55543	1.3779	1.38687	2.7661	2.7774	26.1066	15.9105	42.1281	3.61836	522.132			318.211			840.342			0.0723672
404-37-1	2.3669	2.37583	1.2981	1.30707	2.4542	2.4655	24.1502	15.2334	39.4881	2.69032	483.004	481.147	12.0599	304.668	311.521	14.6867	787.672	792.667	25.7524	0.0538063	0.0535527	0.00506625
404-37-2	2.4327	2.44163	1.3649	1.37387	2.6493	2.6606	24.6085	16.4191	41.1375	2.92437	492.17			328.381			820.552			0.0584874
404-37-3	2.3015	2.31043	1.2726	1.28157	2.3671	2.3784	23.4133	15.0756	38.5915	2.41822	468.266			301.513			769.779			0.0483644
405-58-1	1.8461	1.85503	0.8682	0.87717	1.8631	1.8744	19.8427	8.31534	28.2283	3.54484	396.855	395.997	2.50445	166.307	170.372	10.1765	563.162	566.369	12.2586	0.0708968	0.0689844	0.00235451
405-58-2	1.8688	1.87773	0.9062	0.91517	1.8967	1.908	19.898	9.09766	29.0688	3.31773	397.959			181.953			579.912			0.0663546
405-58-3	1.8267	1.83563	0.8556	0.86457	1.8281	1.8394	19.6588	8.14286	27.8708	3.48508	393.176			162.857			556.033			0.0697016
		error (SD)
WT	235.5	10.1344	10.1344
405-54	814.3	25.4878	25.4878
404-37	792.7	25.7524	25.7524
405-58	566.4	12.2586	12.2586

## Sheet: Figure 3H
Raw data for figure 3H
C2H4 reduction (nmolC2H4/mg protein/hr)
	Five hundred milligram seedlings was used.The content of soluble protein in seedling was estimated with the value of 5‰.
ck	0.04	0.04	0.05	0.03	0.05		PPM
58	0.45	0.48	0.35	0.44	0.36
37	1.08	1.22	1.07	0.92	0.99
54	0.92	0.85	0.93	1.04	1.01
24	0.78	0.89	0.82	0.73	0.78
						average	error(SD)
CK	0.571429	0.571429	0.714286	0.428571	0.714286	0.6	0.106904	0.106904
58	6.42857	6.85714	5	6.28571	5.14286	5.94286	0.737342	0.737342
37	15.4286	17.4286	15.2857	13.1429	14.1429	15.0857	1.43598	1.43598
54	13.1429	12.1429	13.2857	14.8571	14.4286	13.5714	0.968904	0.968904
24	11.1429	12.7143	11.7143	10.4286	11.1429	11.4286	0.761309	0.761309
	CK	0.6
	405-58	5.943
	404-37	15.086
	405-54	13.571

## Sheet: Figure 3I
Raw data for figure 3I
Fixtion of 15N2 (δ15N‰)
				average	error(SD)
WT	0.66	0.68	0.72	0.686667	0.0305505	0.030551
58	2.66	2.77	2.42	2.61667	0.178979	0.178979
37	4.76	4.61	4.87	4.74667	0.130512	0.130512
54	5.22	5.91	5.86	5.66333	0.384751	0.384751
		CK	0.687
		405-58	2.617
		404-37	4.747
		405-54	5.663

## Sheet: Figure4B
Raw data for figure 4B
seedling mortality
50 mg/LKNO3		short-day 15days
	KCN-10				KCN-20				NaN3-0.65				NaN3-1.35
				average				average				average				average
CK	38	37.6	39.2	38.2667	61.5	63.9	65.2	63.5333	18.2	19.5	18.6	18.7667	40.8	42.6	41.3	41.5667
404-37	9.1	8.6	9.7	9.13333	28.7	29.2	27.6	28.5	3.1	3.3	3.5	3.3	3.3	3.5	3.6	3.46667
405-52	9.6	9.3	10.2	9.7	32.8	30.8	29.2	30.9333	5.6	4.8	6.2	5.53333	7.2	6.4	5.6	6.4
405-54	18.2	16.3	16.7	17.0667	34.4	35.6	33.3	34.4333	14.2	12.4	14.5	13.7	14.6	14.3	15.2	14.7
405-58	13.9	14.2	15.8	14.6333	33.6	32.8	31.6	32.6667	5.1	5.3	5.6	5.33333	8.5	7.4	5.9	7.26667
405-62	8.7	10.1	8.7	9.16667	22.8	24.6	25.1	24.1667	5.6	5.2	3.4	4.73333	10.8	5.3	6.8	7.63333
			KCN-10	KCN-20	NaN3-0.65	NaN3-1.35		error (SD)KCN-10			error (SD)KCN-20			error (SD) NaN3-0.65			error (SD) NaN3-1.35
		WT	38.3	63.5	18.8	41.6		0.832666	0.832666		1.87705	1.87705		0.665833	0.665833		0.929157	0.929157
		404-37	9.1	28.5	3.3	3.5		0.550757	0.550757		0.818535	0.818535		0.2	0.2		0.152753	0.152753
		405-52	9.7	30.9	5.5	6.4		0.458258	0.458258		1.8037	1.8037		0.702377	0.702377		0.8	0.8
		405-54	17.1	34.4	13.7	14.7		1.00167	1.00167		1.15036	1.15036		1.13578	1.13578		0.458258	0.458258
		405-58	14.6	32.7	5.3	7.3		1.02144	1.02144		1.00664	1.00665		0.251661	0.251661		1.30512	1.30512
		405-62	9.2	24.2	4.7	7.6		0.80829	0.80829		1.20968	1.20968		1.17189	1.17189		2.84312	2.84312

## Sheet: Figure4D-1
Raw data for figure 4D-1
Fresh weight after 30d culture in long-day condition.
	30 mg/LKNO3					200mg/LKNO3
				average					average
WT	0.87	0.89	0.81	0.856667		1.37	1.42	1.35	1.38
405-37	1.14	1.12	1.2	1.15333		1.35	1.28	1.38	1.33667
405-54	1.28	1.21	1.16	1.21667		1.4	1.41	1.43	1.41333
405-58	1.03	1.05	1.11	1.06333		1.31	1.34	1.33	1.32667
	30	200
CK	0.86	1.38
405-37	1.15	1.34
405-54	1.22	1.41
405-58	1.06	1.33
		error (SD) 30 mg/L KNO3			error (SD) 200 mg/L KNO3
		0.0416333	0.041633		0.0360555	0.036056
		0.0416333	0.041633		0.051316	0.051316
		0.0602771	0.060277		0.0152753	0.015275
		0.0416333	0.041633		0.0152753	0.015275

## Sheet: Figure4D-2
Raw data for figure 4D-2
Fresh weight after 30d culture in long-day condition.
			30mg/LKNO3				200mg/LKNO3
					average				average
KCN10	WT	0.74	0.72	0.78	0.746667	1.14	1.21	1.09	1.14667
	404-37	1.2	1.25	1.18	1.21	1.36	1.28	1.37	1.33667
	405-54	1.24	1.28	1.22	1.24667	1.38	1.42	1.33	1.37667
	405-58	1.17	1.16	1.22	1.18333	1.33	1.36	1.31	1.33333
					error (SD) 30 mg/L KNO3			error (SD) 200 mg/L KNO3
KCN10	WT	0.75	1.15		0.0305505	0.030551		0.0602771	0.060277
	404-37	1.21	1.34		0.0360555	0.036056		0.0493288	0.049329
	405-54	1.25	1.38		0.0305505	0.030551		0.0450925	0.045092
	405-58	1.18	1.33		0.0321455	0.032146		0.0251661	0.025166

## Sheet: Figure4D-3
Raw data for figure 4D-3
Fresh weight after 30d culture in long-day condition.
	Long-day 30days
NaN3		50 mg/LKNO3					200mg/L KNO3
				average				average
ck	43	47	46	45.3333	76	80	77	77.6667
405-37	58	65	62	61.6667	86	88	85	86.3333
405-58	60	68	64	64	82	81	81	81.3333
405-54	56	64	59	59.6667	85	86	89	86.6667
				error (SD) 30 mg/L KNO3			error (SD) 200 mg/L KNO3
CK	0.45	0.78		0.208167	0.208167		0.208167	0.208167
405-37	0.615	0.86		0.351188	0.351188		0.133333	0.133333
405-54	0.595	0.87		0.4	0.4		0.0333333	0.033333
405-58	0.64	0.815		0.404145	0.404145		0.166667	0.166667

[truncated: 13 more sheets: Figure5D, Sheet5E, Figure5F, Figure5H, Figure5I, Figure5J, Figure S3C,S3D,S3E, Figure S4, Figure S5C, Figure S6B, Figure S6C, Figure S7a, Figure S7b]
